# Supplementary material
Source: publisher site journal article supplement (https://www.dovepress.com/article/463026)
Supplement: Supplementary file 1 [file get_supplementary_file.php]

# Performance investigation of Somfit sleep staging algorithm

# Supplementary Material

**Table S1. Percent agreement estimates for individual studies – Center 1.**

| **ID** | **Somfit vs PSG consensus** | | | | **Scorer A vs Scorer B** | | | | **Scorer A vs Scorer C** | | | | **Scorer B vs Scorer C** | | | |
| --- | --- | --- | --- | --- | --- | --- | --- | --- | --- | --- | --- | --- | --- | --- | --- | --- |
| **N1**  **N2**  **N3**  **REM**  **Wake** | **N1+2**  **N3**  **REM**  **Wake** | **NREM**  **REM**  **Wake** | **Sleep**  **Wake** | **N1**  **N2**  **N3**  **REM**  **Wake** | **N1+2**  **N3**  **REM**  **Wake** | **NREM**  **REM**  **Wake** | **Sleep**  **Wake** | **N1**  **N2**  **N3**  **REM**  **Wake** | **N1+2**  **N3**  **REM**  **Wake** | **NREM**  **REM**  **Wake** | **Sleep**  **Wake** | **N1**  **N2**  **N3**  **REM**  **Wake** | **N1+2**  **N3**  **REM**  **Wake** | **NREM**  **REM**  **Wake** | **Sleep**  **Wake** |
| **1** | 81.15 | 83.30 | 89.65 | 95.90 | 88.52 | 90.47 | 96.82 | 98.77 | 89.04 | 91.29 | 96.31 | 98.05 | 87.30 | 89.75 | 96.41 | 97.64 |
| **2** | 67.48 | 79.88 | 80.66 | 81.45 | 77.54 | 90.23 | 92.68 | 92.68 | 78.13 | 90.63 | 92.87 | 93.16 | 79.20 | 91.21 | 92.38 | 92.68 |
| **3** | 73.02 | 77.46 | 89.81 | 92.09 | 81.65 | 87.77 | 97.00 | 97.36 | 76.98 | 83.21 | 94.24 | 95.92 | 79.26 | 86.09 | 95.32 | 96.64 |
| **4** | 73.04 | 84.46 | 91.01 | 91.54 | 80.66 | 89.85 | 95.03 | 96.09 | 81.50 | 92.39 | 95.35 | 96.83 | 76.96 | 88.90 | 94.50 | 96.51 |
| **5** | 78.89 | 81.48 | 87.90 | 89.88 | 83.58 | 88.89 | 96.67 | 96.67 | 84.32 | 86.79 | 92.47 | 95.31 | 81.48 | 86.54 | 92.10 | 94.94 |
| **6** | 82.84 | 88.71 | 94.04 | 95.38 | 82.93 | 89.69 | 95.38 | 97.07 | 85.69 | 90.58 | 95.56 | 96.36 | 85.60 | 92.53 | 95.73 | 96.80 |
| **7** | 75.13 | 76.46 | 79.75 | 82.22 | 89.83 | 92.60 | 96.40 | 97.53 | 89.83 | 91.37 | 94.66 | 96.71 | 91.06 | 94.04 | 95.58 | 97.33 |
| **8** | 66.38 | 73.18 | 84.26 | 87.76 | 82.31 | 86.59 | 95.34 | 95.43 | 81.92 | 87.95 | 94.75 | 95.53 | 80.95 | 87.07 | 95.24 | 96.21 |
| **9** | 75.79 | 81.61 | 88.82 | 93.71 | 83.93 | 88.71 | 93.95 | 95.46 | 79.39 | 86.03 | 89.99 | 96.16 | 78.93 | 86.03 | 89.87 | 95.58 |
| **10** | 62.02 | 63.88 | 66.90 | 70.15 | 87.22 | 95.59 | 95.82 | 95.82 | 88.73 | 95.47 | 96.17 | 96.86 | 86.88 | 95.47 | 96.40 | 97.10 |
| **11** | 75.33 | 77.63 | 80.40 | 87.00 | 87.95 | 92.35 | 94.84 | 95.51 | 78.87 | 83.75 | 91.87 | 94.26 | 82.50 | 88.72 | 95.51 | 97.61 |
| **12** | 77.00 | 80.09 | 87.64 | 90.39 | 80.55 | 81.92 | 94.05 | 98.17 | 83.52 | 85.47 | 96.45 | 98.28 | 87.30 | 89.70 | 94.85 | 98.28 |
| **13** | 81.27 | 86.09 | 93.76 | 93.76 | 88.17 | 91.55 | 97.27 | 97.27 | 86.22 | 90.25 | 97.40 | 97.40 | 86.74 | 91.68 | 98.05 | 98.05 |
| **14** | 82.99 | 85.84 | 90.30 | 92.81 | 85.96 | 88.58 | 96.00 | 98.29 | 84.93 | 86.99 | 93.84 | 97.26 | 90.30 | 93.26 | 96.92 | 98.06 |
| **15** | 84.44 | 86.98 | 93.29 | 94.91 | 93.49 | 95.52 | 97.36 | 99.29 | 94.20 | 96.13 | 98.47 | 98.98 | 92.37 | 95.52 | 97.86 | 99.49 |
| **16** | 89.08 | 91.06 | 92.15 | 92.55 | 93.64 | 97.72 | 99.30 | 99.40 | 90.96 | 95.13 | 96.72 | 96.82 | 91.26 | 96.03 | 97.02 | 97.02 |
| **17** | 75.59 | 77.15 | 95.97 | 98.24 | 83.87 | 85.83 | 97.52 | 98.45 | 85.52 | 86.14 | 95.97 | 98.97 | 84.38 | 86.14 | 95.97 | 98.24 |
| **18** | 88.15 | 90.89 | 96.22 | 96.35 | 93.62 | 96.09 | 97.27 | 97.66 | 93.62 | 95.18 | 97.27 | 97.66 | 94.40 | 96.22 | 97.40 | 97.66 |
| **19** | 70.90 | 74.73 | 86.76 | 87.09 | 87.20 | 90.59 | 97.37 | 97.92 | 84.90 | 86.76 | 93.98 | 94.75 | 82.17 | 85.67 | 93.44 | 93.76 |
| **20** | 73.09 | 76.34 | 90.47 | 93.51 | 83.87 | 88.06 | 94.03 | 96.02 | 85.03 | 88.59 | 94.97 | 96.02 | 84.29 | 88.17 | 95.50 | 97.70 |
| **21** | 68.58 | 70.65 | 77.80 | 82.13 | 81.84 | 87.21 | 94.64 | 95.20 | 86.55 | 91.35 | 94.83 | 95.86 | 78.08 | 84.67 | 94.64 | 96.14 |
| **22** | 78.84 | 81.23 | 91.47 | 95.45 | 85.89 | 88.28 | 92.95 | 98.41 | 87.49 | 89.87 | 95.68 | 99.09 | 85.89 | 88.51 | 94.54 | 98.63 |
| **23** | 76.65 | 81.60 | 95.05 | 97.17 | 76.44 | 85.04 | 96.00 | 98.12 | 81.39 | 88.69 | 97.64 | 98.70 | 84.69 | 92.58 | 97.17 | 98.94 |
| **24** | 72.31 | 73.48 | 76.25 | 84.77 | 83.17 | 87.75 | 90.10 | 91.05 | 90.52 | 92.76 | 94.04 | 94.99 | 87.65 | 91.59 | 92.65 | 92.65 |
| **25** | 77.32 | 78.98 | 81.97 | 85.73 | 82.74 | 87.17 | 88.61 | 94.14 | 88.83 | 90.49 | 92.59 | 95.35 | 84.85 | 91.15 | 93.03 | 97.01 |
| **26** | 74.54 | 75.27 | 76.37 | 78.57 | 87.18 | 91.58 | 92.67 | 94.51 | 90.84 | 93.77 | 94.87 | 96.52 | 89.01 | 95.05 | 95.42 | 95.79 |
| **27** | 79.04 | 86.25 | 93.36 | 95.53 | 82.47 | 91.52 | 94.62 | 96.45 | 81.79 | 89.35 | 95.30 | 96.22 | 81.79 | 91.75 | 95.88 | 97.94 |
| **28** | 75.05 | 78.01 | 90.24 | 91.62 | 83.83 | 87.18 | 96.15 | 97.53 | 86.59 | 87.57 | 94.48 | 97.63 | 83.43 | 86.00 | 94.77 | 97.93 |
| **29** | 67.01 | 72.95 | 76.02 | 79.51 | 81.45 | 90.06 | 94.57 | 95.59 | 86.27 | 93.75 | 96.72 | 97.34 | 82.79 | 92.73 | 96.11 | 96.82 |
| **30** | 87.50 | 91.79 | 95.10 | 96.69 | 84.19 | 89.46 | 94.00 | 96.94 | 86.27 | 89.83 | 94.73 | 96.94 | 83.46 | 87.62 | 95.71 | 97.79 |
| **31** | 71.62 | 75.19 | 85.23 | 89.96 | 83.20 | 87.45 | 94.88 | 94.98 | 87.93 | 91.51 | 95.27 | 95.56 | 82.82 | 88.22 | 95.75 | 95.95 |
| **32** | 83.03 | 89.23 | 91.26 | 91.36 | 83.43 | 90.45 | 93.09 | 93.19 | 82.72 | 89.94 | 95.02 | 95.53 | 82.52 | 88.11 | 92.78 | 93.19 |
| **33** | 58.78 | 64.63 | 82.18 | 82.85 | 79.52 | 84.31 | 97.34 | 98.40 | 80.59 | 84.44 | 98.14 | 98.80 | 73.01 | 76.46 | 96.81 | 98.54 |
| **34** | 79.63 | 84.26 | 91.87 | 93.62 | 82.10 | 86.32 | 93.62 | 95.58 | 84.88 | 88.89 | 92.59 | 93.72 | 83.44 | 87.76 | 93.93 | 95.27 |
| **35** | 57.68 | 61.52 | 71.62 | 76.87 | 77.98 | 82.02 | 94.04 | 96.36 | 81.31 | 85.86 | 94.04 | 96.36 | 81.72 | 88.18 | 95.45 | 95.76 |
| **36** | 82.39 | 85.08 | 94.13 | 95.86 | 88.16 | 90.95 | 97.21 | 97.98 | 87.68 | 90.57 | 96.15 | 98.27 | 90.47 | 93.26 | 96.44 | 98.94 |
| **37** | 80.79 | 83.84 | 94.31 | 96.95 | 89.02 | 91.67 | 97.15 | 98.78 | 88.92 | 92.38 | 97.26 | 99.09 | 91.87 | 95.63 | 97.46 | 98.68 |
| **38** | 74.55 | 76.82 | 93.09 | 94.23 | 81.74 | 84.01 | 96.78 | 97.54 | 86.85 | 88.74 | 96.40 | 97.35 | 79.47 | 81.27 | 96.78 | 97.92 |
| **39** | 81.57 | 83.99 | 91.54 | 92.95 | 88.22 | 89.73 | 98.09 | 98.19 | 86.20 | 88.02 | 96.88 | 98.09 | 90.43 | 92.25 | 97.18 | 98.29 |
| **40** | 75.86 | 82.89 | 86.46 | 87.23 | 79.31 | 87.23 | 92.59 | 94.25 | 82.89 | 89.53 | 93.49 | 95.02 | 77.78 | 86.72 | 92.72 | 94.38 |

**Table S2. Percent agreement estimates for individual studies – Center 2.**

| **ID** | **Somfit vs PSG consensus** | | | | **Scorer A vs Scorer B** | | | | **Scorer A vs Scorer C** | | | | **Scorer B vs Scorer C** | | | |
| --- | --- | --- | --- | --- | --- | --- | --- | --- | --- | --- | --- | --- | --- | --- | --- | --- |
| **N1**  **N2**  **N3**  **REM**  **Wake** | **N1+2**  **N3**  **REM**  **Wake** | **NREM**  **REM**  **Wake** | **Sleep**  **Wake** | **N1**  **N2**  **N3**  **REM**  **Wake** | **N1+2**  **N3**  **REM**  **Wake** | **NREM**  **REM**  **Wake** | **Sleep**  **Wake** | **N1**  **N2**  **N3**  **REM**  **Wake** | **N1+2**  **N3**  **REM**  **Wake** | **NREM**  **REM**  **Wake** | **Sleep**  **Wake** | **N1**  **N2**  **N3**  **REM**  **Wake** | **N1+2**  **N3**  **REM**  **Wake** | **NREM**  **REM**  **Wake** | **Sleep**  **Wake** |
| **1** | 78.78 | 83.08 | 93.92 | 95.11 | 82.84 | 85.70 | 95.23 | 96.66 | 81.17 | 85.34 | 95.47 | 97.62 | 76.64 | 80.81 | 94.99 | 97.62 |
| **2** | 73.26 | 76.31 | 90.55 | 92.73 | 83.43 | 86.63 | 91.72 | 95.78 | 80.38 | 84.88 | 91.28 | 96.51 | 79.65 | 82.56 | 88.23 | 95.78 |
| **3** | 68.76 | 75.53 | 79.59 | 84.14 | 76.21 | 82.30 | 88.78 | 94.87 | 79.88 | 86.46 | 94.39 | 95.55 | 77.08 | 81.14 | 89.26 | 95.26 |
| **4** | 77.43 | 83.00 | 88.28 | 89.05 | 78.00 | 83.38 | 88.66 | 90.59 | 82.52 | 89.53 | 92.32 | 93.95 | 79.25 | 85.98 | 91.74 | 92.60 |
| **5** | 81.94 | 87.79 | 93.64 | 94.15 | 79.01 | 88.09 | 93.44 | 93.95 | 78.61 | 87.29 | 93.24 | 93.34 | 82.54 | 87.08 | 95.36 | 95.76 |
| **6** | 80.64 | 83.85 | 87.63 | 89.33 | 82.25 | 84.89 | 88.39 | 90.18 | 87.25 | 89.14 | 93.48 | 95.18 | 83.95 | 85.65 | 90.65 | 92.73 |
| **7** | 78.85 | 81.07 | 86.54 | 87.55 | 86.23 | 88.77 | 95.65 | 96.56 | 88.16 | 90.38 | 95.95 | 97.47 | 88.46 | 90.18 | 94.94 | 96.66 |
| **8** | 72.60 | 77.30 | 81.50 | 87.10 | 72.10 | 79.20 | 89.40 | 91.00 | 70.70 | 75.80 | 91.70 | 94.50 | 76.90 | 79.90 | 90.10 | 91.90 |
| **9** | 74.29 | 81.57 | 86.45 | 88.66 | 76.41 | 88.57 | 92.17 | 94.01 | 77.88 | 89.03 | 91.34 | 93.27 | 82.86 | 88.39 | 92.44 | 93.18 |
| **10** | 76.44 | 81.22 | 90.44 | 91.44 | 69.89 | 75.67 | 88.11 | 88.56 | 78.00 | 82.89 | 92.78 | 93.44 | 77.11 | 80.33 | 91.78 | 92.89 |
| **11** | 72.30 | 78.36 | 88.78 | 91.81 | 80.59 | 86.05 | 91.00 | 91.91 | 81.70 | 87.46 | 90.29 | 91.71 | 79.68 | 86.15 | 91.30 | 93.12 |
| **12** | 72.66 | 74.72 | 77.90 | 85.77 | 81.65 | 88.39 | 92.13 | 93.26 | 81.93 | 87.92 | 92.51 | 93.16 | 83.99 | 87.17 | 92.51 | 93.54 |
| **13** | 73.98 | 78.47 | 81.50 | 85.27 | 71.06 | 82.13 | 85.58 | 86.62 | 76.59 | 87.15 | 91.01 | 92.89 | 75.97 | 82.55 | 89.13 | 89.97 |
| **14** | 71.13 | 80.31 | 90.38 | 91.37 | 80.64 | 84.85 | 89.27 | 90.15 | 82.74 | 86.62 | 90.93 | 91.70 | 86.28 | 88.16 | 95.80 | 96.24 |
| **15** | 71.56 | 80.99 | 82.53 | 83.93 | 73.09 | 81.89 | 84.95 | 86.22 | 72.58 | 82.40 | 88.90 | 89.16 | 79.72 | 85.84 | 92.60 | 93.75 |
| **16** | 71.03 | 85.31 | 86.41 | 88.41 | 72.53 | 86.51 | 89.21 | 91.71 | 71.13 | 87.61 | 90.31 | 91.41 | 72.43 | 86.61 | 88.41 | 91.51 |
| **17** | 86.34 | 88.02 | 93.66 | 96.63 | 82.57 | 85.45 | 92.38 | 93.96 | 92.28 | 94.85 | 97.62 | 98.51 | 82.67 | 85.25 | 92.38 | 93.66 |
| **18** | 89.08 | 90.90 | 96.47 | 97.11 | 85.50 | 87.95 | 94.14 | 98.93 | 90.51 | 92.32 | 95.63 | 98.61 | 85.61 | 87.31 | 94.24 | 98.83 |
| **19** | 78.34 | 86.3 | 88.84 | 90.72 | 77.13 | 89.72 | 92.60 | 94.70 | 70.72 | 84.75 | 92.38 | 93.26 | 78.90 | 86.08 | 92.49 | 94.14 |
| **20** | 60.79 | 66.14 | 70.40 | 75.64 | 38.12 | 53.76 | 60.59 | 62.77 | 60.99 | 73.07 | 79.60 | 80.59 | 57.92 | 66.93 | 73.86 | 76.44 |
| **21** | 74.05 | 82.84 | 85.02 | 86.54 | 73.29 | 84.26 | 87.62 | 88.71 | 79.91 | 87.62 | 93.16 | 93.59 | 76.22 | 83.06 | 89.79 | 90.77 |
| **22** | 77.80 | 87.14 | 91.65 | 92.42 | 81.76 | 91.32 | 94.95 | 95.16 | 78.79 | 86.48 | 93.41 | 93.52 | 78.79 | 86.48 | 92.64 | 93.08 |
| **23** | 64.02 | 72.07 | 78.80 | 81.63 | 65.00 | 78.04 | 82.61 | 82.93 | 70.54 | 85.87 | 87.61 | 87.61 | 73.04 | 86.30 | 89.57 | 90.33 |
| **24** | 84.54 | 87.42 | 94.46 | 95.95 | 78.57 | 83.69 | 92.22 | 96.59 | 86.57 | 91.26 | 94.99 | 97.76 | 84.86 | 87.74 | 95.31 | 97.33 |
| **25** | 67.15 | 80.93 | 88.08 | 89.01 | 57.09 | 67.68 | 78.54 | 79.60 | 69.01 | 80.79 | 85.43 | 86.36 | 77.48 | 83.44 | 89.67 | 92.45 |
| **26** | 75.79 | 77.91 | 79.60 | 80.44 | 55.50 | 58.67 | 64.38 | 65.22 | 81.61 | 84.04 | 87.63 | 88.05 | 63.85 | 65.75 | 69.24 | 70.40 |
| **27** | 78.85 | 86.89 | 88.08 | 89.08 | 66.04 | 76.96 | 81.63 | 83.32 | 71.50 | 84.71 | 87.19 | 90.37 | 63.65 | 81.93 | 85.30 | 88.38 |
| **28** | 77.03 | 80.36 | 91.71 | 93.52 | 83.03 | 86.94 | 93.04 | 94.47 | 82.27 | 87.42 | 95.14 | 96.00 | 84.46 | 88.27 | 94.47 | 95.81 |
| **29** | 81.20 | 82.44 | 90.04 | 91.66 | 87.17 | 88.54 | 94.89 | 98.13 | 91.03 | 93.15 | 96.89 | 98.13 | 88.29 | 89.41 | 96.01 | 98.26 |
| **30** | 53.59 | 67.49 | 70.29 | 71.52 | 52.35 | 66.93 | 69.51 | 71.30 | 68.39 | 80.38 | 85.43 | 86.43 | 58.74 | 69.17 | 74.33 | 76.79 |
| **31** | 73.53 | 78.25 | 82.96 | 85.18 | 78.83 | 84.60 | 90.95 | 93.36 | 81.14 | 87.20 | 93.74 | 95.19 | 81.04 | 86.91 | 93.94 | 96.05 |
| **32** | 66.53 | 77.30 | 81.31 | 88.38 | 62.20 | 75.29 | 84.16 | 91.13 | 75.40 | 92.19 | 94.93 | 95.99 | 67.05 | 77.93 | 85.11 | 92.40 |
| **33** | 81.61 | 83.40 | 85.39 | 86.38 | 83.90 | 88.27 | 92.64 | 92.94 | 85.79 | 91.75 | 94.23 | 94.93 | 83.30 | 87.38 | 91.65 | 92.45 |

**Table S3. Percent agreement estimates for individual studies – Center 3.**

| **ID** | **Somfit vs PSG consensus** | | | | **Scorer A vs Scorer B** | | | | **Scorer A vs Scorer C** | | | | **Scorer B vs Scorer C** | | | |
| --- | --- | --- | --- | --- | --- | --- | --- | --- | --- | --- | --- | --- | --- | --- | --- | --- |
| **N1**  **N2**  **N3**  **REM**  **Wake** | **N1+2**  **N3**  **REM**  **Wake** | **NREM**  **REM**  **Wake** | **Sleep**  **Wake** | **N1**  **N2**  **N3**  **REM**  **Wake** | **N1+2**  **N3**  **REM**  **Wake** | **NREM**  **REM**  **Wake** | **Sleep**  **Wake** | **N1**  **N2**  **N3**  **REM**  **Wake** | **N1+2**  **N3**  **REM**  **Wake** | **NREM**  **REM**  **Wake** | **Sleep**  **Wake** | **N1**  **N2**  **N3**  **REM**  **Wake** | **N1+2**  **N3**  **REM**  **Wake** | **NREM**  **REM**  **Wake** | **Sleep**  **Wake** |
| **1** | 80.89 | 87.12 | 90.86 | 93.63 | 79.92 | 87.26 | 90.44 | 95.84 | 85.87 | 91.69 | 95.29 | 97.37 | 78.12 | 84.35 | 90.03 | 94.88 |
| **2** | 77.80 | 78.67 | 88.03 | 88.03 | 90.32 | 90.97 | 93.80 | 93.80 | 91.95 | 93.47 | 96.30 | 96.30 | 90.42 | 90.97 | 93.14 | 93.14 |
| **3** | 74.88 | 76.65 | 83.60 | 86.47 | 72.10 | 78.50 | 85.36 | 89.71 | 82.02 | 87.58 | 91.75 | 97.13 | 75.35 | 77.48 | 84.24 | 89.81 |
| **4** | 50.77 | 57.66 | 57.66 | 64.27 | 38.12 | 40.42 | 40.42 | 40.71 | 66.38 | 84.20 | 84.20 | 84.67 | 50.00 | 53.16 | 53.16 | 53.54 |
| **5** | 84.70 | 88.43 | 92.35 | 93.94 | 86.10 | 91.32 | 95.34 | 98.13 | 88.81 | 93.47 | 96.46 | 98.04 | 87.22 | 89.83 | 94.40 | 96.92 |
| **6** | 80.79 | 85.22 | 88.61 | 90.58 | 77.59 | 85.59 | 89.17 | 90.87 | 84.84 | 92.37 | 96.14 | 97.93 | 82.30 | 86.16 | 88.98 | 91.81 |
| **7** | 80.49 | 83.14 | 85.17 | 90.56 | 67.52 | 68.93 | 71.32 | 86.76 | 89.59 | 92.59 | 95.15 | 97.44 | 68.49 | 69.99 | 72.90 | 86.50 |
| **8** | 86.73 | 88.05 | 94.91 | 96.02 | 82.63 | 85.40 | 91.04 | 97.57 | 88.05 | 90.82 | 96.02 | 97.57 | 81.64 | 84.18 | 88.61 | 95.80 |
| **9** | 79.46 | 87.03 | 89.83 | 90.04 | 77.18 | 82.16 | 84.85 | 85.06 | 86.10 | 92.01 | 95.75 | 96.06 | 78.53 | 82.57 | 85.37 | 85.48 |
| **10** | 86.13 | 89.01 | 93.56 | 96.67 | 88.24 | 92.90 | 95.23 | 97.89 | 88.24 | 92.23 | 93.78 | 97.11 | 87.79 | 91.12 | 94.12 | 95.89 |
| **11** | 47.74 | 50.23 | 50.42 | 58.45 | 49.12 | 50.32 | 50.51 | 51.99 | 63.71 | 73.41 | 77.75 | 77.93 | 30.84 | 32.41 | 33.43 | 34.90 |
| **12** | 92.69 | 94.64 | 95.88 | 96.40 | 92.07 | 95.26 | 97.53 | 97.63 | 92.58 | 95.98 | 98.15 | 98.56 | 91.04 | 93.51 | 96.09 | 96.60 |
| **13** | 88.81 | 92.07 | 94.76 | 95.80 | 84.27 | 91.03 | 94.17 | 95.69 | 89.04 | 95.57 | 97.79 | 98.37 | 89.86 | 92.66 | 95.22 | 96.15 |
| **14** | 81.49 | 84.73 | 91.64 | 92.42 | 87.96 | 90.64 | 94.98 | 96.43 | 88.07 | 91.75 | 95.43 | 96.10 | 84.17 | 87.29 | 93.09 | 94.09 |
| **15** | 78.79 | 83.91 | 88.83 | 91.09 | 73.67 | 83.40 | 88.73 | 91.60 | 76.23 | 86.37 | 89.75 | 92.32 | 76.23 | 82.99 | 87.60 | 90.88 |
| **16** | 78.69 | 85.04 | 90.52 | 93.45 | 75.46 | 84.36 | 92.67 | 95.01 | 80.94 | 88.56 | 93.65 | 96.19 | 78.69 | 85.34 | 93.16 | 95.50 |
| **17** | 83.82 | 87.16 | 92.65 | 95.39 | 79.51 | 85.29 | 90.88 | 92.75 | 81.57 | 88.33 | 96.86 | 97.65 | 78.82 | 83.14 | 90.59 | 92.55 |
| **18** | 75.69 | 83.35 | 87.33 | 88.66 | 70.28 | 89.27 | 91.52 | 92.03 | 74.46 | 94.18 | 96.32 | 96.63 | 79.47 | 88.76 | 90.09 | 90.70 |
| **19** | 82.46 | 85.92 | 89.38 | 92.50 | 79.01 | 86.26 | 91.15 | 97.98 | 83.64 | 91.06 | 95.03 | 97.13 | 82.29 | 87.52 | 90.89 | 96.96 |
| **20** | 72.38 | 79.71 | 85.73 | 87.46 | 69.72 | 86.75 | 93.27 | 93.78 | 76.04 | 87.67 | 94.09 | 94.80 | 77.27 | 87.87 | 92.05 | 92.66 |
| **21** | 81.48 | 84.59 | 89.00 | 91.35 | 79.10 | 84.44 | 92.22 | 94.10 | 84.16 | 89.03 | 93.91 | 96.81 | 80.32 | 84.16 | 90.16 | 93.53 |
| **22** | 64.73 | 67.93 | 69.71 | 92.04 | 74.94 | 79.93 | 85.87 | 90.86 | 87.65 | 94.18 | 96.67 | 97.03 | 77.91 | 82.78 | 87.65 | 92.40 |
| **23** | 82.16 | 85.02 | 94.09 | 95.82 | 76.55 | 80.73 | 88.79 | 95.72 | 85.52 | 89.60 | 96.13 | 97.86 | 78.08 | 81.04 | 88.89 | 95.21 |
| **24** | 81.05 | 85.44 | 89.94 | 92.18 | 79.23 | 85.01 | 93.68 | 95.72 | 83.62 | 88.33 | 96.68 | 98.07 | 86.19 | 91.43 | 95.07 | 96.79 |
| **25** | 86.12 | 88.07 | 90.71 | 95.87 | 82.57 | 83.83 | 86.35 | 94.27 | 90.25 | 91.40 | 93.12 | 97.59 | 87.84 | 90.60 | 92.09 | 96.44 |
| **26** | 65.52 | 73.08 | 77.98 | 85.09 | 63.29 | 71.08 | 75.86 | 80.76 | 81.09 | 89.54 | 92.77 | 94.66 | 68.41 | 74.42 | 78.87 | 82.31 |
| **27** | 78.67 | 81.89 | 85.21 | 89.54 | 81.99 | 89.24 | 92.76 | 96.98 | 86.62 | 91.35 | 94.16 | 97.59 | 83.70 | 88.43 | 91.75 | 96.78 |
| **28** | 61.59 | 63.28 | 66.88 | 73.44 | 71.96 | 81.80 | 84.02 | 86.98 | 78.94 | 89.21 | 91.43 | 94.39 | 72.17 | 77.25 | 78.52 | 83.28 |
| **29** | 78.16 | 83.16 | 87.80 | 91.87 | 76.54 | 83.16 | 88.50 | 93.61 | 84.90 | 88.73 | 92.10 | 95.24 | 76.42 | 83.39 | 88.97 | 93.26 |
| **30** | 77.63 | 82.58 | 85.70 | 88.82 | 79.25 | 87.74 | 88.92 | 93.66 | 84.41 | 90.65 | 93.12 | 94.30 | 77.42 | 83.55 | 86.34 | 91.18 |
| **31** | 84.15 | 88.08 | 93.68 | 94.61 | 78.45 | 87.25 | 91.92 | 95.23 | 82.49 | 90.26 | 93.99 | 96.06 | 81.14 | 86.11 | 91.40 | 94.82 |
| **32** | 85.22 | 86.27 | 90.15 | 92.87 | 90.88 | 91.51 | 94.76 | 97.59 | 94.13 | 96.33 | 98.11 | 98.64 | 91.51 | 93.61 | 96.33 | 98.53 |
| **33** | 76.50 | 77.67 | 80.77 | 86.65 | 74.68 | 79.70 | 83.44 | 91.24 | 86.86 | 90.49 | 94.12 | 97.22 | 77.99 | 81.84 | 86.86 | 92.09 |

**Table S4. Percent agreement between Somfit algorithm and consensus PSG hypnogram for different genders.**

| **Gender**  **(N# Studies)** | **Percent Agreement - Mean (SE)** | | | |
| --- | --- | --- | --- | --- |
| **N1-N2-N3-**  **REM-Wake** | **Light NREM-N3-**  **REM-Wake** | **NREM-REM-Wake** | **Sleep-Wake** |
| **Male (59)** | 74.93 (1.12) | 80.17 (1.04) | 85.17 (1.16) | 88.20 (0.99) |
| **Female (47)** | 77.65 (1.08) | 81.37 (1.03) | 88.08 (0.99) | 90.67 (0.84) |

**Table S5. Kappa statistics for agreement between Somfit algorithm and consensus PSG hypnogram – five sleep stages (N1-N2-N3-REM-Wake), different genders.**

| **Gender**  **(N# Studies)** | **Kappa - Mean (SE)** | |
| --- | --- | --- |
| **Sleep study based** | **Pooled confusion matrix** |
| **Male (59)** | 0.632 (0.017) | 0.651 (0.003) |
| **Female (47)** | 0.682 (0.015) | 0.695 (0.003) |

**Table S6. Percent agreement between Somfit algorithm and consensus PSG hypnogram for different age groups**

| **Age**  **(N# Studies)** | **Percent Agreement - Mean (SE)** | | | |
| --- | --- | --- | --- | --- |
| **N1-N2-N3-**  **REM-Wake** | **Light NREM-N3-**  **REM-Wake** | **NREM-REM-Wake** | **Sleep-Wake** |
| **< 65 yo (85)** | 76.47 (0.89) | 80.97 (0.80) | 87.14 (0.82) | 89.71 (0.73) |
| **>= 65 yo (21)** | 74.79 (1.78) | 79.60 (1.81) | 83.99 (2.14) | 87.63 (1.66) |

**Table S7. Kappa statistics for agreement between Somfit algorithm and consensus PSG hypnogram – five sleep stages (N1-N2-N3-REM-Wake), different age groups.**

| **Gender**  **(N# Studies)** | **Kappa - Mean (SE)** | |
| --- | --- | --- |
| **Sleep study based** | **Pooled confusion matrix** |
| **< 65 yo (85)** | 0.658 (0.013) | 0.677 (0.002) |
| **>= 65 yo (21)** | 0.637 (0.026) | 0.652 (0.004) |

**Table S8. Percent agreement between Somfit algorithm and consensus PSG hypnogram for different BMI categories**

| **BMI**  **Category**  **(N# Studies)** | **Percent Agreement - Mean (SE)** | | | |
| --- | --- | --- | --- | --- |
| **N1-N2-N3-**  **REM-Wake** | **Light NREM-N3-**  **REM-Wake** | **NREM-REM-Wake** | **Sleep-Wake** |
| **< 25 (21)** | 78.44 (1.38) | 82.86 (0.10) | 87.74 (1.26) | 90.17 (1.16) |
| **[25; 30[ (43)** | 75.45 (1.07) | 79.67 (1.01) | 85.94 (1.08) | 89.13 (0.87) |
| **>= 30 (42)** | 75.69 (1.52) | 80.68 (1.44) | 86.51 (1.54) | 89.02 (1.35) |

**Table S9. Kappa statistics for agreement between Somfit algorithm and consensus PSG hypnogram – five sleep stages (N1-N2-N3-REM-Wake), different BMI categories**

| **BMI Categpory**  **(N# Studies)** | **Kappa - Mean (SE)** | |
| --- | --- | --- |
| **Sleep study based** | **Pooled confusion matrix** |
| **< 25 (21)** | 0.700 (0.016) * | 0.707 (0.004) |
| **[25; 30[ (43)** | 0.645 (0.016) | 0.664 (0.003) |
| **>= 30 (42)** | 0.644 (0.023) | 0.663 (0.003) |

**Note.** * Greater than kappa for the overweight category (BMI >= 30) (*p* < 0.05).

**Table S10. PSG Interscorer performance measures for sleep stages – Mean (SE)**

| **Measure** | **Centers**  **(N# Studies)** | **Sleep Stage** | | | | |
| --- | --- | --- | --- | --- | --- | --- |
| **Wake** | **N1** | **N2** | **N3** | **REM** |
| **Sensitivity** | **All (106)** | 87.54 (0.68) | 45.79 (1.17) | 81.22 (0.79) | 76.96 (1.59) | 89.14 (0.77) |
| **2+3 (66)** | 85.72 (0.93) | 40.20 (1.21) | 79.60 (1.12) | 75.69 (2.10) | 87.09 (1.05) |
| **Specificity** | **All (106)** | 95.70 (0.48) | 94.58 (0.31) | 88.65 (0.42) | 96.79 (0.19) | 98.36 (0.11) |
| **2+3 (66)** | 94.47 (0.71) | 93.85 (0.44) | 87.59 (0.59) | 97.07 (0.19) | 98.04 (0.14) |
| **PPV** | **All (106)** | 87.54 (0.68) | 45.79 (1.17) | 81.22 (0.79) | 76.96 (1.59) | 89.14 (0.77) |
| **2+3 (66)** | 85.72 (0.93) | 40.20 (1.21) | 79.60 (1.12) | 75.69 (2.10) | 87.09 (1.05) |
| **NPV** | **All (106)** | 95.70 (0.48) | 94.58 (0.31) | 88.65 (0.42) | 96.79 (0.19) | 98.36 (0.11) |
| **2+3 (66)** | 84.47 (0.71) | 93.58 (0.31) | 87.59 (0.56) | 97.07 (0.19) | 98.04 (0.14) |
| **Accuracy** | **All (106)** | 93.70 (0.65) | 90.24 (0.52) | 85.80 (0.53) | 94.67 (0.26) | 97.17 (0.19) |
| **2+3 (66)** | 91.87 (0.97) | 88.81 (0.72) | 84.39 (0.73) | 94.96 (0.29) | 96.60 (0.25) |
